# Supplementary material
Source: PubMed Central journal article supplement (PMC6776065)
Supplement: 41396_2019_455_MOESM2_ESM.pdf [file 41396_2019_455_MOESM2_ESM.pdf]

**A**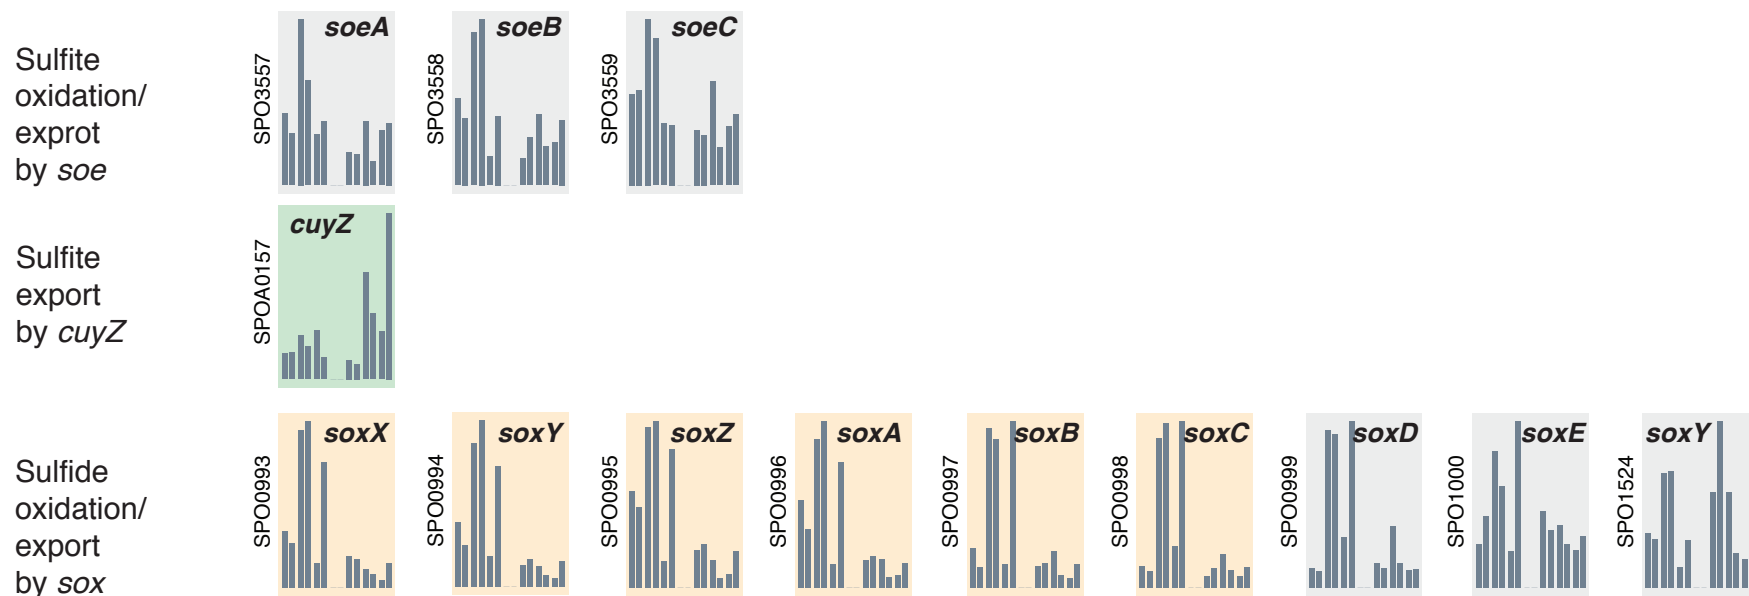**B**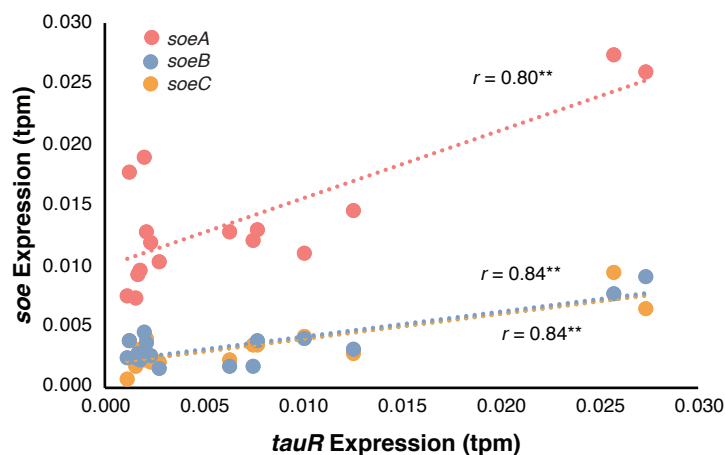**C**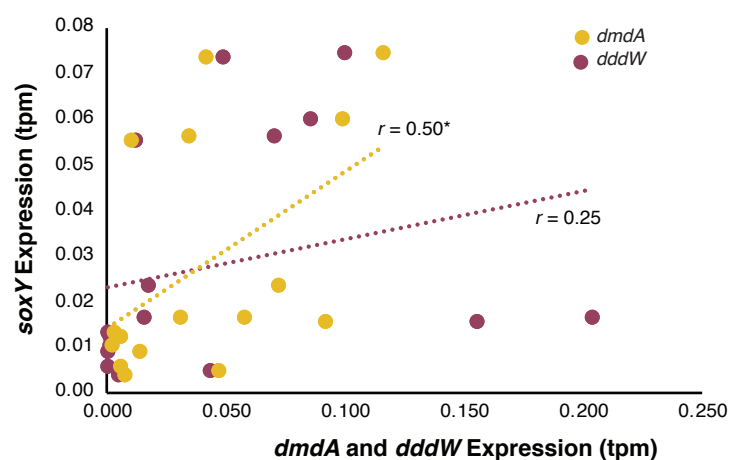

**Figure S5.** (A) Expression of sulfur export pathways in *R. pomeroyi*. Histograms indicate relative expression (TPM) for the indicated genes, with the first 6 bars in each representing expression during the dinoflagellate phase (sampling days 7, 9, 12) and the last six bars representing expression during the diatom phase (sampling days 23, 30, 37), with replicates ( $n=2$ ) shown separately. Orange backgrounds indicate genes with significant enrichment in the dinoflagellate phase and green indicate significant enrichment in the diatom phase (DESeq2,  $p < 0.05$ ). (B) Expression levels of sulfite export genes *soeA,B,C* versus *tauR*. (C) Expression levels of sulfite export gene *soxY* versus *dmdA* and *dddW*. Significant correlations (Pearson's  $r$ ) are indicated by one ( $p < 0.05$ ) or two ( $p < 0.01$ ) asterisks.
