# Supplementary material
Source: PubMed Central journal article supplement (PMC6776065)
Supplement: 41396_2019_455_MOESM3_ESM.pdf [file 41396_2019_455_MOESM3_ESM.pdf]

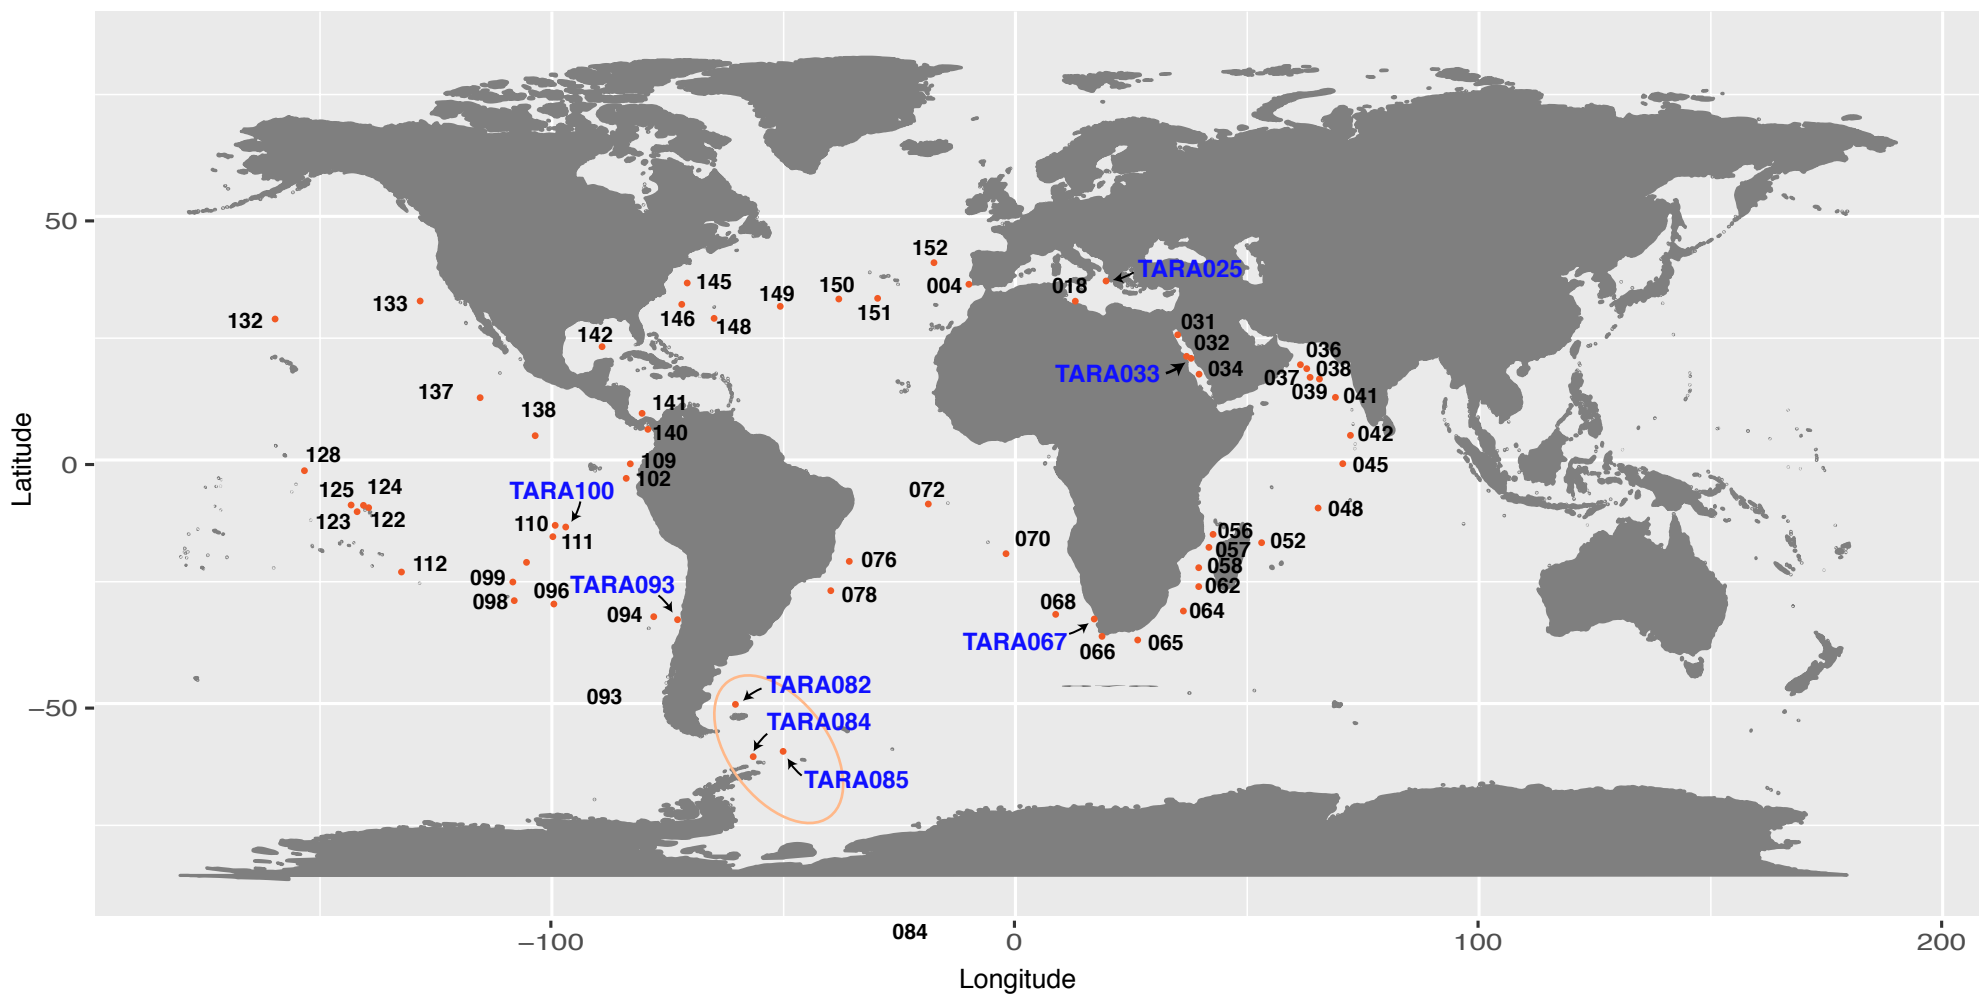

Figure S6. Location of Tara Oceans stations analyzed in this study. Samples with high DOS gene abundance clustering in a Bray Curtis dissimilarity analysis are indicated, with 10 of the 17 samples within this cluster from SRF and DCM samples within the orange ellipse.
