# Supplementary material
Source: PubMed Central journal article supplement (PMC6776065)
Supplement: 41396_2019_455_MOESM7_ESM.pdf [file 41396_2019_455_MOESM7_ESM.pdf]

**Table S4. DOS gene reference sequences used in HMM construction.**

**BetC (HMM cutoff score = 410)**

>WP\_011046830.1 choline-sulfatase SPO1083 [*Ruegeria pomeroyi*]  
MTRFNLILMVDQLNGTLFPDGPADWLHAPNLKRLAARSTRFANAYTASPLCAPGRASFMSGQLPSRTGVYDAAEFRRSDIPTYAH  
HLRRAGYQTCLSGKMHFVGPDLHGFEERLTTDIYPADFGWTPDYRKPGERIDWWYHNMGSVGTGAGVAEITNQMEYDDEVAYHAKA  
KLYDLARGKDDRPWCVTVSFTHPHDPYVARRKYWDLYEDCEHLLPQVGLDGYDNHDPHAKRIFDANDWRNFDITEEDIRKSRRAYF  
ANISYLDDKLGEEILEVLETRQEAIILFVSDHGDMLGERGLWFKMNFYEGSARVPLMVAAPGMEPGRIDTPVSTIDVPTLGLGELAG  
VDMAEIAPWTDGTSLSVLANGTERTAPVLMYAAEASYPVLSMRYGKWKYNRCALDPDQLFDLADDPHEMTNLADHPDHQGTQVQS  
LRAKSQARWDLDRFDAEVRASQARRWVVEALRQGGYYPWDYQPLQKASERYMRNHMNLNLEESQRFPRGE

>WP\_009828548.1 choline-sulfatase [*Rhodobacteraceae bacterium HTCC2083*]  
MSKLNILIFMVDQLNGTFFPDGPADWLHVPNIKLAARSTRFKNAYTASPLCAPGRASYMSGQLPSTTGVYDAAEFSSIPTYAH  
HLRRAGYQTCLSGKMHFVGPDLHGFEERMTTDIYPDFGWTDPDYRKPGERIEWWYHNMGSVGTGSGIAEITNQMEYDDEVAYHATR  
KIYDYARGKDDRPWCMTVSFTHPHDPYVARRKYWDLYEDCAHLMPEVGPPIPYEDQDAHSQRILDANDRDNFNISDKDIRRSTRAYF  
ANISYLDDKLGEEVMEALESTRQEAIMFVADHGDMLGERGLWFKMSFFEGSARVPMI SSPDMEPLIETPVSNIDVCPTLCLDLAG  
VDMEEIMPWTEGMSLKPQGQVVERTAPVAMEYAAEASYSPLVCLRYGKWKHIRCALDPDQLFDLADDPHELTNLADAPHEHQGTQLQT  
LRAKSEQRWDLDRFDAEVRASQARRWVVEALRNGDYFPWDYQPLQKASERYMRNHMDLNVLEESQRFPRGE

>WP\_008035825.1 choline-sulfatase [*Rhodobacterales bacterium HTCC2255*]  
MTKPNLLIFMVDQLNGTFFPDGPADWLHAPNLKLAGKSTRFKNCYTASPLCAPGRASFMSGLLPSKSRVYDAAEFSSDIPTYAH  
HLRRAGYQTCLSGKMHFVGPDLHGFEERLTTDIYPADFGWTPDYRKPGERIDWWYHNMGSVGTGSGIAEISNQMEYDDEVAYNAKR  
KIYDLSKGDNRPWSLTVSFTHPHDPYVARRKYWDLYEDCAHLMPTVSAFEYEKHDTHSKRIFDANNWRDFDITDDDIKRSRRAYF  
ANISYLDDKIGEEILEALETTKQEATILFLSDHGDMLGERGLWFKMSFFYEGSARVPLMVCSPKMKPGLVTVPVSNIDLAPTLCDLAD  
VSIIEIAPWCEGESLVHLGQGGERTSPVAMEYAAEASYSPLVCLRYGKWKYRCLLDEDDQLFNLDEDPNELINLVNTHKHQGTQLNQ  
LRVKSEKRWNLNKFDTDVRESQAKRWIVVEALRNGNYFPWDYQPLQDASERYMRNHMDLNEVENDNRFPRGE

>2524484855 choline-sulfatase [*Donghicola xiamenensis DSM 18339* :  
G455DRAFT\_scaffold00007.7]  
MSQPNILIVMVDQLNGTLFPDGPVDWLHVPNLKKLASRSSRFANAYTASPLCAPGRASFMSGQLPSRTGVYDAAEFRRSDIPTYAH  
HLRRAGYQTCLSGKMHFVGPDLHGFEERLTTDIYPADFGWTPDYRKPGERIDWWYHNMGSVGTGAGVAEISNQLEYDDEVAYHARA  
KLYDLARGRDRPWCMTVSFTHPHDPYVARRKYWDLYADCDHLQDPDIPAIPIYEDQDAHSKRIFDANDWRNFDITPRDIERSRRAYF  
ANISYLDDKIGEEILQVLEETQQEAIIVVFLSDHGDMLGERGLWFKMNFYEGSARVPLMISAPGLPVGRVETPVSTLDVVPTLGLALAG  
VDLGEIAPWTDGEDLCPARGARRDTPVALEYAAEASESPLVCLRQGWKYTRCLLDPEQLFDLEADPHELTNLADPAHADTLER  
FREMAGAHWQLDRFDAEVRASQARRWVVEALRQGGYYPWDYQPLQKASERYMRNHMDLNVLEDSQRFPRGD

>WP\_093152573.1 choline-sulfatase [*Thalassobaculum litoreum*]  
MARPNILILMVDQLNGTLFPDGPAPWLHTPNLRLAERSTRFANAYTASPLCAPGRASFMSGQLPSLTGVYDAAEFSSAIPTYAH  
HLRRAGYQTCLSGKMHFVGPDLHGFEERLTTDIYPADFGWTPDYRKPGERIDWWYHNLGSVGTGAGVAEISNQMEYDDEVAYHAVR  
KLYDLSRGRDRPWCMTVSFTHPHDPYVARRKYWDLYEDCEHLQPTVPAMDYEDHDPHSQRIFDANDWRNFDITEENIRRSRQAYF  
ANISYLDDKIGEEILDTLERTRQEAIILFVSDHGDMLGERGLWFKMSFFDGSSRVPLMISAPGMAPGLIAPASTLDVPTLAEELAG  
ISMEEVTPWTEGKSLVSPGGTTPRPGSVAMEYAAEGSYAPLVGLRRGRWKYTRCVLDPEQLFDLEADPHELTNLADPAHADTLAE  
FRAEADGRWDLARFDAEVRSSQARRWVVEALRNGAYYPWDHQLPKASERFMRNHMDLNVVEENQRFPRGE

**CuyA2 (HMM cutoff score = 271)**

>WP\_084790992.1 D-cysteine desulfhydrase SPO2657 [*Ruegeria pomeroyi*]  
MPIQGGIVKTFVDAPVSGAVDDQALLRRALERFARIRLGHLPSPLEPLDRLSEALGGPRIWVKRDCTGLSSGGNKTRKLEFLMAS  
ACEAGADTIITQGAIQSNHARQTAAAAARLGLHCHLLEDRTGAADLAYTLNGNVLLDRLHGATISRRAGGSDMAAEMERLAATLR  
GKGRPYVIPGGGSRNVGALGYVNCALRELSQALSMGLDIDALIHATGSCGTQAGLVAGLAGLSWNTHLLGIGVRAPQERQEAMVF  
DLACETMDYLGMIPIVRSVGRANCDHVGPYGLPTEAMCEAVRMLARLEGLLLDPVYTGKAMAGLIDLTRQGYFDGMANIVFLHT  
GGSAAALFGYPEIFGLPGYQP

>WP\_008033848.1 D-cysteine desulfhydrase [*Rhodobacterales bacterium HTCC2255*]  
MTNATQTNEVEMPFSPEMEQLCKDLSLTLAKFPKVRGLHLPLEPLDRLSEILGGPRLWVKRDCTGLSSGGNKTRKLEFLMAD  
AQSKGADTIITQGATQSNHARQTAAAAAKLGMEECHLLEDRTGSDNHSYIILNGNVLLDRLHGASVSKRSGGTDMAEMQDFAESLI  
EKGKNPYIIPGGGSNAIGALGYVNCARELLEQASEIIGLKVDAHVHATGSAGTQAGLVAGLAAIQSDIHLGIGVRAPKDKQEAMVF  
DLAQTADYLDTGKIERDKVRAICDYVAGYGLPTDGMKAVKLLAQSEGLLFDVPVYSGKGLDGLLDQIKKGYFAGMDNVVFLHT  
GGSAAALFGYPETFELPGYAN

>CUI00049.1 L-cysteate sulfo-lyase [*Leisingera aquaemixtae*]  
MNTAVTEDTMAGGGNLALVKRALENFPRVRLGHLPLEPLDRLSEELGGPRIWVKRDCTGLASGGNKTRKLEFLMAEALKLGAD  
TVITQGATQSNHARQTAAAAAKGLDLCQILLEDRTGSDNVAYNFNGNVLLDQLHGATISKRAGGADMNAEMETLAGALQDQGRKTY  
IIPGGGSRNVGALGYVNCAAELEEQAGALGLKVDALVHATGSSGTQAGLVAGLAGLASDIHLGIGVRAPQEQKESMVFDLACKTM

DYLGMGAEINRASVRANCDYVGPYGLPTEGMRAALLKLARLEGLLDFPVYSGKGLDGLIDQVRKGYFDGMDNIVFLHTGGSAAALF  
GYPGIFGLPGYQD

>2236438413 alpha proteobacterium sp. SCGC AAA076-  
C03MGRRLRIKHYFFVSVFVIVSVNHKGINLVTNATQTNEVEMPFSPEMEQSLCKDLSLTLAKFPKVRGLHLPPTLEPMDRLSEIL  
GGPRLVWKRDDCTGLSSGGNKTRKLEFLMADAQSKGADTIITQGATQSNHARQTAAAAKLGMECHILLEDRGSDNDHSYILNGNV  
LLDRHLHGASVSKRSGGTDMAEMQDFADSLIEKGNPYIIPGGGSNAIGALGYVNCARELTEQASEIGLKIDALVHATGSAGTQAG  
LVAGLAAIQSDIHLLGIGVRAPKDKQEQMVFDLAQKTADHLDTGKIERDKVRAICDYVAGYGLPTDGMKAVKLLAQSEGLLFD  
PVYSGKGLDGLIDQIKKGYFAGMDNVVFLHTGGSAAALFGYPETFELPGYAN

>2624356654 Rhizobiales sp. genome\_bin\_27  
MNLARFPRVRLGHMPTLEPMDNLSKHLGGPRIWVKRDDCTGLSSGGNKTRKLEFLMAEALAQKADVITQGATQSNHARQTAAAA  
AKLGMACMILLEDRGTDEAYTLNGNVLLDQLHGASISKRKSGADMQAEMESVAADLRKTGGRPYVPIPGGSTAVGALGYVNCAL  
ELLNQANEMGLKIDLLVHATGSAGTQAGLVAGLVALNSGIPVLGIGVRAPKDRQEANVLALAEKTAHLGLAGIMKREHVANCY  
VGQYGIPTEGMVEALKLVARMEGILLDFPVYSGKGMAGLIDLKKGEMREHENIVFLHTGGSVGLFGYPTAFGLQGYQA

### DddK (HMM cutoff score = 188)

>gi|499600944|ref|WP\_011281678.1| cupin [Candidatus Pelagibacter ubique HTCC1062]  
/dddK/  
MIFVKNLASVLSQEWSSTEKYPGVRWKFLIDADFDGSSGLSLGF AEIAPGGDLTLHYHSPA E IYVVTNGKGILNKSGKLETIKKGD  
VVYIAGNAEHALKNNKGTLEFYWIFPTDRFSEVEYFPAKQKSG

>gi|654569998|ref|WP\_028037226.1| cupin [Candidatus Pelagibacter ubique HTCC9022]  
/dddK/  
MIFVNNLKSVDQEWSSTEKYPGVRWKFLIDADYTKSSGLSLGF AEIAPGGDLTLHYHSPA E IYVVTNGTGILNKSGQLEEI KKG  
VVYIAGNAKHALKNNKGTLEFYWIFPTDRFSEVKYLS

>WP\_014953073.1 cupin domain-containing protein [alpha proteobacterium HIMB5]  
MIFIKNMNSVSDQDWTTEKYPGVRWKFLIDEDYNGSKGLSCGF AEI E PGGNLTLLHHAPDEIYVVTNGS  
GTLNKSGELEEI KKG DVVYIAGNAKHALQNNKGEVLGFYWFPTNKFKDVEYISDE

>WP\_027306832.1 cupin domain-containing protein [Candidatus Pelagibacter ubique  
HTCC1013]  
MIFVKNLASVLSQEWSSTEKYPGVRWKFLIDADFDGSSGLSLGF AEIAPDGD LTLHYHSPA E IYVVTNGK  
GILNKSGKLETIKKGDVVYIAGNAEHALKNNKGTLEFYWIFPTDRFSEVEYFPAKQKSG

>WP\_018413735.1 cupin domain-containing protein [Candidatus Pelagibacter ubique  
HTCC1016]  
MIFVKNLASVLSQEWSSTEKYPGVRWKFLVDADFDGSSGLSLGF AEI V PGGDLTLHYHSPA E IYVVTNGT  
GILNKSGKLETIKKGDVVYIAGNAEHALKNNKGTLEFYWIFPTDRFSEVEYFPAKQKSV

>WP\_006997514.1 cupin domain-containing protein [Candidatus Pelagibacter ubique  
HTCC1002]  
MIFVKNLASVLSQEWSSTEKYPGVRWKFLVDADFDGSSGLSLGF AEI V PGGNLTLLHYHSPA E IYVVTNGT  
GILNKSGKLETIKKGDVVYIAGNAEHALKNNKGTLEFYWIFPTDRFSEVEYFPAKQKSV

>2503364858 IMG accession Cupin domain-containing protein [Candidatus Pelagibacter  
ubique SAR11 HTCC9565 : HTCC9565 HTCC9565\_contig2]  
MIFVNNLKSVDQEWSTTEKYPGVRWKFLIDADFDGSSGLSLGF AEIAPG  
GD LTLHYHSPA E IYVVTGGSGILNKSGELEKIKEGDVVYIAGNAKHALKN  
NGKDTLKFYWIFPTDRFSEVEYFN

### DddP (HMM cutoff score = 382)

>gi|83950505|ref|ZP\_00959238.1| metalloproteinase, family M24 [Roseovarius nubinihibens  
ISM] /dddP/  
MNQHYSETRKIDPSRGATLGDNTPNNDNRIEIGPTQLAFGEWATAGLALPDLQRMREFRWNRLTQAVVDRDYGGVLMFDPLNIRYA  
TDSTNMQLWNAHNPFRALLVCADGYMVIWYKNSPFLSTFNPLVREQRFGADLFYFDRGDKVDVAADAFSNEVRTLIAEHGGGNMR  
LAVDKIMLHGLRALEAQGF E I MEGEELTEKTRAIKGPDEILAMRCAVHACETSVAAMEHFAREAVPQNGTSEDDVWAVLHAENIKR  
GGEWIETRLLASGPRTPNFQECGPRIIQNNEIISFDTDLIGSYGICVDI SRSWWVGDAAAPPADMVYAMQHAHEHIMTNMEMLKPG  
VTIPELSERSHRLDEQFQAQKYGCLMHGVGLCDEWPLVAYPDQAVPGSYDYPLEPGMVLCVEAAVAVGGNFTIKLEDQVLITETG  
YENLTSYFPD PALMGR

>gi|163736748|ref|ZP\_02144167.1| peptidase M24 [Phaeobacter gallaeciensis BS107] /dddP/  
MSSDTFETMSNTEPEMNEHYRDTRKIDPTRGATLGDNTPNQDRVEIGTQQLAFGEWAAAGLQLPDLQAMRRYRWERLTRFINDRD  
YAGLLVFDPMNIRYATDSTNMQLWNTHNPFRRALLICADGYMVMWDYKQAPFLSEFNPLVREQRAGADLFYFDRGDKVDVAADAFAN  
EVRTLLAEHSGGNTRLAVDKIMLHGLRALEAQGLEVFPEEELTEKCRVKGPEIILAMRCANHACETTVAEMERYARSAIPGGQIS  
EDDVWAVLHAENIRRGGEWIETRLTSGPRTNPWFQECGGRIIQNNEIISFDTDLVGSYGICIDISRSWWIGDRAPPADMVYAMQH  
GVEHIQSNMEMLKPQGNLQELSRNCHLLDAQFQKQKYGCMMHGVLCDWEPLVAYPDAMVEGAFDYDLEPGMVLCVEALVSPGGD  
FSIKLEDQVLITETGYENLTTYPFDPALMGTTTR

>gi|294084994|ref|YP\_003551754.1| peptidase M24 [Candidatus Puniceispirillum marinum IMCC1322] /dddP/  
MNQLIVGNSNRKIDPTRLRHLKPDNTPDDNDRVEIGPTALAFEWKQLGLTAPDMPALRAYRLERLQQQIRIHDCAGLLLFDPNLR  
YATDATNMQLWTSNHNARACFVPPPEGKMLWDFHNCHELSAHLPLVGEELRGGASFFYFETGDRTEAAAKAFADQMLDIMHHYAPGN  
KRLAVDKMENLGYAALVGLGVEVLEGGVLTTEHGRSINKENELNAMRCAIATCELAVEEMRDEMRAGISENELWATLHAGNIKRGGE  
WIETRILSSGPRTNPWFQECGPRIMQDGLMAFDFTDLVGTGYGCCDISRTWLVGDGSPSDAQKHLYQVAYDHVMTNIGLIEPGMRF  
ADMTRIAHRLPEEYRALRYGVLAHGVGLCDEYPSVRYPEDVEHHGYGGCFEVMGTLCEAYVAVGGRDGVKLEEQVVVTDQGAIP  
LSTYRYEDAFSL

### DddW (HMM cutoff score = 91)

>gi|56695368|ref|YP\_165716.1| ortholog hypothetical protein SPO0453 [Ruegeria pomeroyi DSS-3] /dddW/  
MTAMLDSEFATDLTAATSLHQPGNLPHPHAIDAENVPLSGGTDPTYGEVRWRTLINGTEAAPRDMVLGIAEFGPGHQLRPHRHPTP  
EFLYGLLEGSGIVTIDGVPHEIRAGVALYIPGDAEHGTVAGPEGLRFAYGFASASFEAIEYRFTASA

>gi|86139257|ref|ZP\_01057827.1| ortholog hypothetical protein MED193\_09710 [Roseobacter sp. MED193] /dddW/  
MQQETTLDFAPDMTTLATDLGETEQFHQASNLPHAPQDILLVVDAAQVPLSGGTDAAAYGEVRWRTLINSCSEKSREMVLGIAEFEP  
HGRLLPHRHDPPEFYGLLEGSGVVTIDGTPHEIRPGVAIYVANAETHDTQAGPDGLRFTYGFAEASFEQITYRFSATTEARG

>gi|260426459|ref|ZP\_05780438.1| conserved hypothetical protein [Citreicella sp. SE45] /dddW/  
MEDPMAEPGIDVANLPQIAALMTLAVAANARGAPLEGGGDPAFGTVRWRSLFSDDRTPTRGMVPGIAEFAPFGTLLPHRHGHEKIC  
FGLSGGGVVTIDGVPHPPLGPEVALYVPEDAETHGTVAGPGGLRFL

### DmdA (HMM cutoff score = 411)

>gi|294083644|ref|YP\_003550401.1| aminomethyl transferase [Candidatus Puniceispirillum marinum IMCC1322] /dmdA/  
MAQSGLNMSRRIRRSPTDKVEEYGVGRGFSVVNHMLLPKAFETSVEEDDYWHLREHVQIWDVGVQRQVQITGLDAARLVQMMTPRDV  
RQAKIGQCLYVPMIDEDAGMLNDPVLIKLADDFWLSIADSDILLWVQGLALGLKLNVDVEEPDVSPLAIQGPKAIALMADLFGEA  
IRDLGYFYQYGFIDVLTGTRQLIARSGYSKQGGFEIYLHGHLGSDLWDMYQAGKQYNIMPGPCPNLIERIEGGLMSYGNFTRDNNP  
LECGFEELCYFGDDIDYIGKIALRRIAEEGPKLIRGKIFGGGKAPPCGKPFVLTTRDNIHQITSGIYSPRLKCNVGMSSMAKG  
HWDFTVVFVHTPDGIVREGTVSPLPF

>gi|114771227|ref|ZP\_01448647.1| aminomethyl transferase family protein [alpha proteobacterium HTCC2255] /dmdA/  
MASAMIFPSRRLRATPFTSRVSKLGVSGFTVYNHMLLPTVFESLQEDYKHLKEYVQMWVDSVERQVQLLGKDAHLACMISARDLT  
NAQTGRCCYAPICDQSGAIINDPIALRLADDKYWFSIADSDILLWVQGLALGLDLNVEICEPDVSPPLAIQGPMAEDLMVDVFGAEI  
RNKIFHFKEFPFNGRMLNIARSGWSKQGGFEIYLNDSQLGPELWDTIWEKGEKYNIRPGCPNLIERIEAGLLSYGNDMNREDSPL  
EIGLEKYISLDSNVDFIGKALLKQRKDGIKRLLGIEIDGSEMPPLSMPEEVFKDGKIGIVTSAVFSPTYNGNIGFAMIEASNA  
TAGTEVSVDSKAGIRKGLCEIGDFWSQVQSKN

>gi|254456019|ref|ZP\_05069448.1| aminomethyltransferase [Candidatus Pelagibacter sp. HTCC7211] /dmdA/  
MKKFPPIAKSRRLRSTPYTDRIERQGVSSYTVYNHMLLPASFVSVEADYHHLKEFVQVWDVAAERQVEISGKDSAQLVQLMTCRDLS  
KSKVKGCCYAPIIDGQGNLVNDPIINKLAENRWLSIADSDVIFFAKGLASGNKFDVDIKEPDVNIILAVQGPLSDKLMKSVFGEKI  
SQLKFFNFDFYEFKGMKHFIAARSGWSKQGGFEIYVENAEAGKELYDYLFEEAGLEFNKPGCPNLIERIEGALLSYGNDFDNRDNP  
EANFEKYTNLDSEVEFLGKDRLLKIRDKGVKRKLMGVKIDHDQIDMYCEKTLFDDNNNIIGFVRSATYSPTFKKVIIGIAMINKPYW  
NSKNSFKIEINEKIHLGNICDLPLFI

>gi|254456670|ref|ZP\_05070099.1| probable aminomethyltransferase, putative [Candidatus Pelagibacter sp. HTCC7211] /dmdA/  
MSKNIKLNMSRRIRRTPYTNRVEQHGVSDFTVVNHMLLPKGFKNVVEEDYLHLSKEVQMWVDSVQRQVQICGPDAAKLIQKLTPRS  
IKDMTIGKCFYIPLMNLNAGMINDPVLLKLDLDDMFWISADSDILLWAKGLALGLNVLNVEEPDVYPLAIQGPKSEELMVSIFGD

EIKKIKFFNFRVIDFEGTKQIIARSGYSKQDGF E I YFKVHENYFDK VEMGEKLWDTIWEAGKKFNISPGCPNLIDRIEAGLMSYGN  
DFTGENNPLECNLEKYCKADASHDFVKGQALTKIQSEGI IQKMRGIIFDGAPCAATGQPLKIFSKDNKRIGQITSGIFSPRIKKN  
GLSMILKDYWNVNGNEVI IETLDGEKRNGTITSLPFPD

>gi|119503015|ref|ZP\_01625100.1| aminomethyl transferase family protein [marine gamma  
proteobacterium HTCC2080] /dmdA/  
MNAPVISFSRRLRVSPFELRSLEGSKSASVYNHLVLPCTCYESLEADYWHLREHVQLWDVACQVQVEVQGPDAAEFVEYLTPRDVSR  
CQVGQCIYTPLIDEAAGIINDPLVLRLAEDRFWISLSDSDVLLWAKGLALGKGFVVRVDPDVFPMISIQGPKSADLLSRVLGDSIR  
ELKFFRFVETEIAGTPVVVARTGWSGGGGEIYVQEPDAGVTLWDTLAAAGEDLQVRVGCNLIERIESGLLSFGNDMTLANNPLE  
AGLDRFFKLGKSADYLGRAALEAIAEEGVKNRLVKLVIEGEPIANPRTVYTVQGESGENIGTVTSAVYSPRLCCNIGLGYLPVSYC  
DEGKAAIVLTPQGPRELRIANNDWSS

>gi|86139921|ref|ZP\_01058486.1| aminomethyl transferase family protein [Roseobacter  
sp. MED193] /dmdA/  
MAFISPSRRLRRTPFSEGVAAQVKAYTVYNHMLLPTVFESPEADYHHLKHKHVQIWDVSCERQVELRGPDAGRMLQMLTPRDLRGM  
LPGQCYVPIVDETTGMLNDPVAVKLAEDRWISIADSDLLYVWKGIANWRDLVLDVDEPDVSPPLAIQGPKEELLVRFVFGESIRS  
IRFFRYKRLAFQGRDLVIARSGYSKQGGFEIYVEGSEIGMPLWNKLFAGADLNVRAGCPNLIERIEGGLLSYGNMTDNDTPHEC  
GLGRFCDHTAIGCIGRDALLRVAKEGFPVQIRAIISIA GEPVPACTEFWPLYAGGKRVGRVSSAAWSPDFRTNVAIGMVRMTHWDA  
GAKLEVETPDGMRQATVREKFWI

>gi|56696787|ref|YP\_167148.1| dmdA gene product [Ruegeria pomeroyi DSS-3] /dmdA/  
MASIFPSRRLRRTPFSAAGVKAQYTVYNHMLLPTVFDLQADCAHLKEHVQVWDVACERQVSIQGPDALRLMKLISPRDMDRM  
ADDQCYVPTVDRHGMNDPVAVKLAADHYWLSLADGDLQFGLGIAIARGFDVEIVEPDVSPPLAVQGPRADDL MARVFGAVRD  
IRFFRYKRLAFQGRDLVIARSGYSKQGGFEIYVEGSEIGMPLWNKLFAGADLNVRAGCPNLIERIEGGLLSYGNMTDNDTPHEC  
GLGKFCNSPEDYIGKAAALAEQAKNGPARQIRALVIGGEIPPCQDAWPLLDAGRQVGVGSAIHSPEFGVNVAIGMVRMTHWDA  
MEVETPDGMRPVTVREGFWR

>gi|71082952|ref|YP\_265671.1| dmdA gene product [Candidatus Pelagibacter ubique  
HTCC1062] /dmdA/  
MKNFSIAKSRRLRSTPYTSRIEKQGVTAITYNHMLLPAAFSGSIEDSYKHLKEHVQIWDVAAERQVEISGKDSAEVLQMTCRDLS  
KSKIGRCYCPIDENGNLVNDPVVLKLDENKWWISIADSDVIFFAKGLASGHKFDVKIVEPVVDIMAIQGPKS FALMEKVF GKKI  
TELKFFGFDFDFEGTKHLIARSGWSKQGGYEVYVENTQSGQKLYDHLFEVKGKFNVGPVGCNLIERIESALLSYGNDFDNDNPF  
ECGFDQYVSLDSDINFLGKEKLKEIKLKGPKKLRGVKIDIKEISLGTGSKNIYDENNNVIGELRSACYSHPHFQKVIIGIAMIKKSHW  
EASQGFKIQINDNTINGNVCDLPFI

>gi|399156270|ref|ZP\_10756337.1| dimethyl sulfoniopropionate demethylase [SAR324  
cluster bacterium SCGC AAA001-C10] /dmdA/  
MRPELLISSRTRSTPFSSRVEACGVKAYSVYNHMLLPLIFRSLEEDYWHLCESVQVWDVSCQRQVEITGPDTQKLVQMLTPRDLQ  
AELGQCFYAPLCEDETTGMINDPILIKHSNNHWWLSIADSDVMLWAKGLATGFGDLALVTEPDIWPLAVQGPKEALLSRVFGKEIS  
KILFFRSSTFNQGTMLVARSGWSKQGGFEIYVNDLAEGLGQLWDELFAKGEDLNVGPGCPNLIERIESGLLSFGGDMGYDTPPE  
CGLEKVVSLDADIESLSDELTRKSKTKLIGIVIDRKNVNLINKRVFVIGSNVVGKITSDTWSPRYSAFALAFARCELKHLEDAQN XG  
IDXGTX

### HpsN (HMM cutoff score = 682)

>RpomDSS3 [Ruegeria pomeroyi DSS-3]2,3-dihydroxypropane-1-sulfonate dehydrogenase  
MTIEYLKKAASLTSKSDASDVQETVRAILADIEAGGDQVALDYAAKFDREYEGSIIILSPEEIEAACAKVPEK  
LKADIRFAHDNVRRAEATQKATLTDVELEVVPVITGQKAI PVDAAGCYVPGGRYSHIASAIMTVTTAKV  
AGCKHIMACSPPRPGVGVAPAIYVAAHICGADT IMAIGGVQGVASMAFGLFGLPKAKILVGPNGQFVAEA  
KRMLFGRVGDIMAGPTDSLILADRTADPHIVTTLVLSQAHEGYNP VVWLVTDRLAEKVIEMI PSYIA  
DLPEVNRDAAAARWYAEVILCADREEMAATSDRYAPEHLTVMAEDLDWWLDRLSCYGSFLFLGEESTVS  
YGDKAAGTNHVLPTSGAASYTGGLSVHKYMKIVTWQRGTREGYKPVAEATARIARLEGMEGHARAADVRL  
AKYFPDETFFDLTANG

>EDQ35720.1 histidinol dehydrogenase [Hoeflea phototrophica DFL-43]  
MSRIYLKKAECTASTDSGSRVDTVQSILDAIEAGGEASAREYAEKFDRTYGNIIIVTREEIERAAASLPQK  
LKDDIRFAHDNVRRAEATQKATLTDVELEVVPVITGQKAI PVDAAGCYVPGGRYSHIASAIMTVTTAKV  
AGCKHITVCSPPRPDVGHPAILY TADICGADTILAMGGVQGVASMAFGLFDVPPAGILVGPNGQFVAEA  
KRILFGRVGDIMAGPTDSLILADKADPEIVAADLVGQAEHGYNSPVWLVTDRLAEKVIEMI PSYIA  
DLPEVNRDAAAARWYAEVILCADREEMAATSDRYAPEHLTVMAEDLDWWLDRLSCYGSFLFLGEESTVA  
FGDKASGTNHVLPTSGAARYTGGLSVHKYMKIVTWQRATRDGSRPIAEATARISRLLEGMEGHARTADIRL  
RKYFPLDNFDLSGVDQDI

>ABG33272.1 histidinol dehydrogenase [Roseobacter denitrificans OCh 114]  
MAREYLKKAECTAMTDAGDVREIVQNILSDIEAGGDAAAMRYAEQFDKYAGNVILTDEIEAASAKVSQK

LKDDIAFAHDNVRRAEYVQKSTMKDVELEIVPGLIAGQKAI PVRAAGCYVPGGRYSHIASAIMT VTTAKV  
AGCQHITACSPRPDVGINPAIVYAANLCGADKILSMGGVQGVAAAMTFGLFGLPKADILVGPNGQFVAEA  
KRILFGRVGDIMDIAGPTDSLVLADATADPFMVATDLVLSQAEHGYNSPVWLVTDSRVLAEKVMELVPGMID  
DLPELNDRNFAAARDYAEVIVCANREEMAACSDDYAPEHLTVQAE DLPWLLDRLQCYGSLFGLGEETT VS  
FGDKASGTNHVLP T SRS AKYTGGLSVHKYMKIVTWQRSTRDGARPVAEATARISRLEGMEGHARAADARL  
HKYFPNENFDLSAVD

>EAP77625.1 histidinol dehydrogenase [Roseovarius nubinhibens ISM]  
MARDYLKKAHLTSRSDASDVHDTV RKILADIEAGGDQAALDYAAKFDKYDGNVMLTAE EIDAACALVPEK  
LKADIRFAHDNVRRAEYVQKSTVANVEYEIVPGVIAGQKAI PVDAAGCYAPGGRYSHVASAIMT VTTAKV  
AGCKHITACSPRPVGVNPAIVYAAHICGADKIMAMGGVQVAAAMTFGLFGLPKANILVGPNGQFVAEA  
KRILFGRVGDIMDIAGPTDSLILADKTADPHIVATDLVLSQAEHGYNSPVWLVTDDRALAEDVMARVPALID  
DLPEVNRDAAAAWRDYAEVILCADREEMAATSDDYAPEHLTVQAE DLDWLLDRLTCYGS LFLGEETT VS  
YGDKATGTNHVLP T SGAASYTGGLSVHKYMKIVTWQRATRTGSKPIAEATARISRLEGMEGHARAADVRL  
AKYFPDETDFDLTAHG

>EAQ46924.1 histidinol dehydrogenase [Roseobacter sp. MED193]  
MAREYLKRATLTSKSDASDVHDTVVKILSDIETGGDAAALDYAAKFDKYNGLSVLLSAEEIEAACALVDPK  
LKADIQFAHDNVRRAEYVQKSTVADVEYEIVPGLVAGQKAI PVDAAGCYAPGGRYSHVASAIMT VTTAKV  
AGCKHITCCSPRPVGI G IAPAIVYAAHICGADKIMAMGGVQGVAAAMTFGLFGLPKANILVGPNGQFVAEA  
KRILFGRVGDIMDIAGPTDSLILADKTADPHIVATDLVLSQAEHGYNSPVWLVTDDRDLAQDVMRSRVELID  
DLPQVNRNATAAARDYAEVIVCADREEMAATSDDYAPEHLTVQADDLDWLLNRLTCYGS LFLGEETT VS  
YGDKAAGT NHVLP T SGAANYTGGLSVHKYMKIVTWQRATREGSKPVAEATARISRLEGMEGHARAADVRL  
AKYFPDETDFDLTANG

>EAQ24107.1 histidinol dehydrogenase [Roseovarius sp. 217]  
MTREYLK KATLTSTSNAGDVHETVQGILADIEAGGDKVALEYAAKFDREYEGKIILTPEDIAAASALVPEK  
LKRDI EF SHANVRRAEQAQRET LRDI EVEVVPGLIAGQKSI PVRAAGCYVPGGRYSHIASAIMT VTTAKV  
AGCKHIVACSPRPVGVVAPAI IYAAHVCGADVIMAMGGVQGVAAAMTFGLFGLPPANILVGPNGQFVAEA  
KRILFGRVGDIMDIAGPTDSLVLADATADPMVVATDLVLSQAEHGYNSPVWLVTDNRLAEVVMRLV PDLIA  
DLPEVNRDAAAAWRDYAEVILCADREEMAATSDDYAPEHLTVQAE DLNWWLLDRLTCYGS LFLGEETT VA  
FGDKASGTNHVLP T SGAANYTGGLSVHKYMKIVTWQRATREGAKPVAEATARISRLEGMEGHARTADIRL  
RKYFPDETDFDLTANG

>AAZ65418.1 histidinol dehydrogenase (plasmid) [Ralstonia eutropha JMP134]  
MISYLKKA EKTPTQETATQAQKVVTEMLAEIQARGKDAVRQYAKQLDGS GDIVLTPDQIREQTKDVPAGV  
RADIDFAIRQVTDFA LAQRESLKEFSVELHPGV TAGQRVLPVNVVGCYAPAGRYAHIASAYMGVATAKAA  
GVKTVVACSPFRGQGIHPHVLYAFQAAGADVIMALGGVQVAAIASMAYGLFTGKPADVVVGPNGK FVAEAK  
RSLYGQVGDIVFAGPSEVAVIDETADPAIVASDLVQA EHGHE SPAWLF TTSRDLADRVMALVPELIAK  
LPPTARDAATAAARDYGEVILCGTREETVEEISDRYASEHLEVHTADLDWLLANLTCYGS LFLGEETT VAF  
GDKTSGPNHVLPTKGAARYSGGLSVHKFMKTLT WQQMTREATRQIGQVTARISRLEGMEAHARTADDRMA  
KYFPNASFEMGTPVEV

>2504637969 sulfopropanediol 3-dehydrogenase [Gammaproteobacteria sp. OM252 HIMB30 :  
HIMB30\_contig00039]  
MTIEYLK KAKKTSTSDASDVTKIVQGILNDIESGGEDACLKFRDQFDKYDGNVVLTADEIQAACDQVPEK  
LKRDIQFAHGNVRRAEYVQKSTIVDTEVEV I PGLIAGQKAI PCNAAGCYAPGGRYAHIASALMT VTTAKV  
AGCQNI VACSPRPVGV IHPAIVYTAHICGADHIVALGGVQVAAIAMAFLGLFGLPKADILVGPNGQFVAEA  
KRILFGRVGDIMFAGPTDSLILADASADPELVAADLVQA EHGHE SPAWLF TTSRDLADRVMALVPEYIS  
TLPELNDRNATKAWNDYAEVIVCADREEMAATSDDYAPEHLTVQADDLDWLLDRLTCYGS LFLGNETTVA  
FGDKASGPNHVLPTSGAAKYTGGLSVHKYMKLV TWQRSNTDAMKSVAEATARISRLEGMEAHARSADIRL  
QKYFPPEEVFDLTGTDNG

>ADE40381.1 histidinol dehydrogenase [Candidatus Puniceispirillum marinum IMCC1322]  
MTITYLKKASKTPQTGTDETQKIVADMLATIEAGGEEAALEYGRKLDGYS GNAVVS AEQIAAAAADAVSPQ  
LKDDIQFSLDRVRTFAEQRDSIKSFETELSPGLWAGQKLIPIETAGCYVPGGRYAHVASAIMSIATAKV  
AGVKHIVACSA PNGEDGNPAILYAMNLCGADTILSLGGVQVAAIAMA YGLFTSKPARILVGPNGRNFVAEA  
KRSLYGRVGDIMFAGPTEI AVIADESADPAVVAEDLVQA EHGHE SPAWLF TTSQKLADDVMAQM QTHIE  
ALPEIARNAATAAARDYGEVILCDTDEEVAAISDEYAAEHLEVHTSKDDWFM DRLQNYGSLFVGEETT VV  
YGDKCSGTNHILPTKGAAYHTGGLSVHKFMKVTTQRMTREANREVGAAAARISRLEGMEGHARAADVRL  
RKYFPGENLA

## IseK (HMM cutoff score = 202)

>637289836 SPO2358 iseK TRAP dicarboxylate transporter, DctP subunit, putative [Silicibacter pomeroyi DSS-3: NC\_003911]  
MKVSDKLSGVSRRDFFRVAGRFGLSSTVLGLGGLTGAVTLPSTLAAAAESTYDKRFKKEAKHTLKFGAAGFNARNLLIERAGCLEFA  
RDLEERTDGEIRVEFIGDNQICGQLSCVEKTONGIVDIYAASSTQNSAGGAPYLNVLVDYAYVFPGRASQYHFLYSPESNAIILRDPLE  
KRHGLKFLFSSHCELRGLQMGKSFADKPTVTKLEELFGTKNRVTGTQLGRIAMQLLNLPVPAWEETLDGLKTGLIDGAETWASAV  
AYANMSPVVSQSVDLRFFCGTEHTSMSAKVFDSDLGYLQDAVMESAYLAQVHVQAANEALVKTVGVSDPVLPGTLFDEHDVRFAP  
LAEDQIKMAEEMCSPEYNPEPWAQWRERLNNWSGGIDTYAELHRVAREVPADMKPENVEPRRWWKG

>2551559243 A142DRAFT\_01565 tripartite ATP-independent transporter solute receptor, DctP family [Vibrio splendidus 12E03 : A142DRAFT\_AJZD01000156\_1.156]  
MMMTRKTLISAIVGATFAFGATASAYAATTLKLSHNHPRDHAVHEAMTFMAKEVREMTDGEVRIRIYPDAQLGTRQRESMELMQNGA  
LDMVKSNAEELEAFSPAYSSFNMPYLRDQAHYYSVTDGEVGRDILNSSRDSGFIGVTYYDAGARSFYTSKPIINTPEDLKGKLVRV  
QPSPSAIAMVKALGNGPTPLAYGELYTALQQGVVDAEENNI PSFSLSRHSEVSKYFSLDEHTMVPDVLVI STKTYDKLTTEQQDAL  
MKAASDSSELMKKLWAESEAKERAKAEKMGVTFVPEPKAAAFALAVQPMYDALETSNPELSALIDRIQSVK

>2654246990 Ga0114105\_107642 TRAP-type C4-dicarboxylate transport system, substrate-binding protein [SAR324 cluster deltaproteobacterium REDSEA-S21\_B5 Ga0114105 : Ga0114105\_1076]  
MFTHKISRRLDIKIVAGRYGLSSTLLGAATLGGALTLPELAAAANSTYKRFKNTPKVKLKFGAAGLNERNLLIERAGCLQFVNDLE  
ERTDGAIRVEFIGSNLQCGQLNCVKKTMQGITDIYASSTQNAAGGAPYLNVLVDYAYVFPGSSAIYFLYHPDSEKILREPMRRRH  
IQFLFSHAELRIGIMLGLKWKDKPTVTSVEQLAGSKNRVTGTQLGRIAMNLMKLNVPPIAWEETLDGLKQGLIDGAETWMSAVAYAN  
MSPVVSQCVDLRFFCGTEHTAMSSKVFDFKLSGDLQDAVMESAYTTQIHVQGVHEASLVHTCGATNPQMPDTIFAKHGTRVANISTS  
ERRKAEEMCSPEFQPHWEEWRERINKWSGGIDTYSSIIYKIAREIPADTRAENVEPRRWWK

>2592588220 MOLA814\_00455 TRAP-type C4-dicarboxylate transport system, substrate-binding protein [Betaproteobacteria bacterium MOLA814 : AYMW01000001]  
MWFAQLEKRTNGALKIEFIGSNAICNLDCVKKTQQGIVDLFTASTQNSAGSAPYVNVLDFAYMFPSPRAAQHHFLYSKSEALLR  
EPMRRLHNIQFLYSHCELRLMMGKFKFEDKPLVTSIDDLAGTKNRVTGTQLGRIAMQLMNLNVPPIAWEETLDGLKQGLIDGAETW  
MGAAAYANMAPVLSQAVDLKFFCGTEHTAMNFKTFQKLPPIQDIVMETSFDAQQYTQQRQEKALIDVVGAVANPGKDTVFGKAGV  
RVATLSDAEILKAEKMCSEFNPKPWEWRERLNKMSGGRDVYKEIYDIAREIPKMNNAVVDVTPNRWWV

>2523988608 G511DRAFT\_01008 TRAP-type C4-dicarboxylate transport system, substrate-binding protein [Neptunomonas japonica DSM 18939 : G511DRAFT\_scaffold00003.3]  
MAKITSSKPEQGSVRRDFFRVAATYGMSSSTLMAATALGSFTLPQLAQAAEGNAKRRYKKEAKHVLKFGASGFNENLLIERAGC  
IDFLNDIEERTDGEIRVEFIGDNQICGQLNCVKKTQQGIVDMFTASTQNSAGGAPYLNVLVDYAYMFPTRASQYHFLYHPDSQKLLR  
DPLREKHGLQFLFSSHCELRGLQMGKLGWKDKPLITSIEQLRGTKNRVTGTQLGRIAMQLELNPVPIAWSETLDGLKQGLIDGAETW  
AGAVGYANMSPVVSQSVLDLFFCGTEHTMMSASMFDSFSGDLQDAVMESYLTQVKIQAQEAALVNTVGATSPSPGLTFHKGHV  
RMANLSDEERAKAERICAPEFNPEPWTQWRERLNDKWSGGQDITYGSIHKIAREISRDTLAENVAPRRWWKS

>647613112 RB2083\_572 twin-arginine translocation pathway signal [Rhodobacterales bacterium HTCC2083 scf\_1106200183017 genomic scaffold: NZ\_DS995276]  
MGTSKINHLTRRDLFKVAGQYGMSSSTLMAAGAFGGAMSLANLASAAESTYKRFKFAKPKHTLKFGAAGFNARNLLIERAGALEFA  
RDLESRSDDGEIRVEFIGDNQICGQVSCVEKCCQQGIVDIYAASSTQNSAGGAPYLNVLVDYAYQFRNRADQYHFLYHPDSQRLLRDPYE  
KRHGLKFLFTHCELRGLQMGKSTFADKPTVTKLEELFGTKNRVTGTQLGRIAMQLLNLPVPAWEETLDALKTGLIDGAETWSSAV  
AYANMSPVVSQSVYLDLFFCGTEHTAMNAGVFDLSGELQDVMMESSYWAQTHVQAANEALVKTVGVSDPILPDTIFAKNNVRNAF  
LSKEEKRAEEMCSPEFQPLWEEWRERLNGWSGGHDTYQDIYINISREIDENTLLENVEPRRWWKA

>647670959 RKLH11\_3142 twin-arginine translocation pathway signal [Rhodobacteraceae bacterium KLH11 scf\_1108856220443 genomic scaffold: NZ\_DS999532]  
MEIGKLSGISRRDFFRVAGRYGMSSSTLLAAGGFGGAMSLANLAQAESAESNYEKRFKFAKPKHTLKFASGFNTRNLLIERAGAIIEFA  
RDLEERTDGEIRIEFIGDNQICGQLSCVEKTONGIVDIYAASSTQNSAGGAPYLNVLVDYAYMFPSPRAAQYHFFYSPESQRILRDPLE  
KRHGLKFLFTHCELRGLQMGKSTFADKPTVTKLEELFGTKNRVTGTQLGRIAMQLLNLPVPAWEETLDALKTGLIDGAETWASAV  
AYANMSPVVSQSVNLKFFCGTEHTSMSAKVFDLSGELQDAVMESSYFTQALIQGANEALLNTVGFSEPLPNTIFAENGVRPAF  
LPDDQIKLAEEMCAPNYNPEPWAQWRERLNKWWAGGIDTYQEIYDIAREIPADTLLENVEPRRWWMGQA

## NaaA (HMM cutoff score = 266)

>637288147 SPO0660 naaA peptide ABC transporter, periplasmic peptide-binding protein [Silicibacter pomeroyi DSS-3: NC\_003911]  
MKHLFKGLIAATAVASVLVGTATAAEPRRGGLTKTQLGNLRLTNSAVQSGIVTGFFGAQLFASPLRYDDSWTPQPYLAESWEVS  
ADGLKVTNLNVKNAVFDHGHPITSSDIAFSVKVIEAHFPKSMFAPVTSVDTDPDDHTAVLNLSHPHPGLMLAMSGQLMSIIPHEIY  
GDGQDFKTHPRNIENVVSGSPFKLAEYKNGEHVILERFDDFFIEGRPYLDKIVMRIITDSSARAIAYENGELDFGAFSEPLIINR  
LKKVDHLTVTPTGYGAIGALDWLAINTTKGPLADKRVRQAIAYAI DKNFIQNALMQGTVDQSDNTGHPDPSFYNADVNAYALDLDK

ANALLDEAGYPMKGDERFAVTIDYGWPSAKPHVEYVRAALKKVGINVEVRASADFTWAKRMGTMDFDLSWDAVFNWGDPSIGVHR  
TYLTSNIAKGVWSNTQGYSNARVDELLDMAGKENDPEKRRKALYAEFQSVINDEVPYFVQTLPHYHTVYSNKVMNAPVNGIWTSSP  
LDQVWLKE

>640640659 RB2150\_09984 peptide ABC transporter, periplasmic peptide-binding protein  
[Rhodobacterales bacterium HTCC2150, unfinished sequence: NZ\_AAXZ01000008]  
MKQFLKGTFTAAAALSVLATGVIAEDTPKQGGTLTVLSTNVRNLNSAVQSGIVTGYPGAQLFASPLRYDEDWTPQPYLAESWNVS  
DDGLTVTLNLAKNAKFDHGDVALTSKDVAFSVDVIKANHPFKSMFAPVESVETPDDHTAVLKLKSKPHPALMLAMSGQLMSIIPQHIY  
GDVPIDEVKTHPRNNENTVVGSGPFKLVVEYKSGEHVILERFDDFFIEGRPYLDKVVMRIISDPAARAIAYENGEVHMGAFAESLPRII  
NRLKKVDGLTVTSEGYGGIGPLDWLAMNNTKGPLADVVRKAIHAHVADKNFIRNALMQGTTDESRTGIHPDPSPFYNADVEAYELDL  
DKANALLDEAGFPMNGTRFALTI DFGWPGVKPQVEYVKAALKKVGIDVTVRASADFTWAKRMGTMDFDMSWDTVFNWGDVPIGV  
HRTYNSENIAKGVWSNTQGYNSRVDELMAAAVENDMAKRTALYAEFQOI IADELPVYHVNTLPHYHTVYSDKVGNPPLGIWGTST  
PIDMTYLKD

>2551215194 RCA23\_c03720 peptide/nickel transport system substrate-binding protein  
[Planktomarina temperata RCA23, DSM 22400 (RCA23) : RCA23c]  
MKHILKSMILTATAAVAILASGAI AEDAPRKGGTLITVMATNVRNLNPAVQSGIVTGYPGAQLFAAPLRYDEDWTPQPYLAKSWDVS  
EDGLTVTLNLVDNAVFDGTPITSEDAVAFSVDTIKAHHPFKSMFAPVSVDTDPDAHTAVLNLSKPHPALMLAMSGQLMAIIPKHIY  
GDGQDPKTHPRNTEENVVVGSGPFKLVVEYKSGEHVILERFDDFFIEGRPYLDKVVMRIITDPAARAIAYENGEVHMGAFAESLPRIINR  
LKKVDSLTVTDEGYGGIGPLDWLAMNNTKGPLADVNRKAIAYAVDKNFIRKALMQGTASDSKTGIHPDPSPFYNANVEGYDLDLK  
SRALLDAAGYPMQGSRFSLTIDFGWPGVKPQVEYVKAALKKVGIDVEVRASADFTWAARMGEMDFDMSWDTVFNWGDVPIGVHR  
TYSSDNIKGVWSNTQGYSNARVDELIAMAAVETDPAKRTALYAEFQEI IADEVPVYHTNTLPHYHTVYNDVNGNPPLGIWGTSTPI  
DMTYLKK

>2654239695 Ga0114103\_10743 peptide/nickel transport system substrate-binding protein  
[SAR324 cluster deltaproteobacterium REDSEA-S14\_B10 Ga0114103 : Ga0114103\_1074]  
MKNLLKSLILSIFIIIPGVLSVQAGSHKGGTILIMSVGATPRHLNPAVQSGIDTGAPGAQLFATPLRFDENWNPQPYLAESWSISD  
DGLSVTLNLVKGATFFHDGKPIITSKDVAFSIKTIKAHHPFKTMFGAVKRVDTPDSHTAVIRLSKPHPALMLALSSQLGAVIPEHIY  
DGQDPKTHPRNSENENVVVGSGPFKLVVEYKSGEHVILERENFFLEGKPYLDKIVMRI IKDPSARSLGRENGEIHLSKPTSDVVRVQAI  
AYAVDRNFLINAVMRGTSKPAYTGIHPDSIFHEPNVERYDLINKANQILDDAGYKNSDGIRFPLNIDYGWPSAKPMAEYMKPQL  
KKIGIDVTVRSTAGFPWAOKTYSNWEFDMTVDVFNWGDVPIGVHRTYLCEENAKKGVWSNTQQYCNPEVDQILEKAGQENDRNQR  
IAFYSKAQKLIKSDVPIYFTDTPVYHTIYNHKKVGNPSTIWGTCSPLDEVFLK

### TauA (HMM cutoff score = 374)

>637288161 SPO0674 tauA taurine ABC transporter, periplasmic taurine-binding protein  
[Silicibacter pomeroyi DSS-3: NC\_003911]  
MMTAKTKLLGAVAGLALAI GAMPAAVA AEGEITVAYFLEWMPPEYAKQKGTYDEVLGVKVNWVSFESGVKMSAAMASGDVHLSVS  
QGVPPFVATSAGQDLQILDVAVSYADNDNCVVRSELEIDKDNAGELAGKKVAVPLGTA AHYGF LKQMNHFVGDVASMDDVMDPP  
DGAAALTAQGA VMFCGWGSLRRAL EHG NVLLTGDEKTELGILVFDVTS GPAGWVAENSDLVAKFLKVTADANAMWADEANRAEML  
PLIAKDAGMDEEATASTIATFKFPTIEQQLSGGWLGNAQTFMKGVADVFEAGSIDSALDITYENAVNTGPLSAAGGM

>2517702672 taurine transport system substrate-binding protein [Rhodobacterales sp.  
HTCC2255 (original sequence, contaminants removed) : AATR01000003]  
MKITKTLTAMAVLAAATGTSAVALDELVVGYFMEWPTANQYAQHNLKLYDEALGIPVKWVSFDAGTAMSAAMASGDVHISYSQGV  
PFLVATAAGQDLQVIDIAETYSNDNCCVRSKLEIDKSNASELAGKKVSVPIGTA AHYGF LKQMSHFVSVDSMEVVDMAPPEGAAA  
AFASGEFDMVCGWGGPLRRAL EHG NVLLTGA EK TALGILVVDVTS TPASFADENAEVLQTF LGVTAASNAMWNSGGFTSLMLPHIAR  
AGMDMEGTAKAILAVMAFMSAETQLSDQWMGKWLGLDRLKQALALEAAGKITALDDYDALVNTTYLAAA

>2528297236 AB747F18903\_00590 taurine transport system substrate-binding protein  
[SUP05 cluster bacterium AB-747\_F18AB-903 : AB747F18903\_contig\_11\_0.12]  
MKSIIYKIGATVVSIAISVNMALDELNVAYFEEWMPPEYAKQIGAYDEALGMTVNWKAFGTGTAMSAAMASGDVHISVSQGVPP  
FIVAASGGQSIQVVDIAVSYSDNDCVVS KLEIDKSNASELAGKKVSVPIGTA AHYGF LKQMSHFVSVDSMEVVDMAPPEGAAA  
FAQGSTDMFCGWGSLRRAL EHG NVLLTGA EK TALGILVVDVTS TPASFADENAEVLQTF LGVTAASNAMWNSGGFTSLMLPHIAR  
DAGMDEGDTADTMATFVFPVSNQLGSNWLGSGAAFLKGVADVFEVSGNIPSARGSYANAINTDGLGLEGAAQ

>2592588209 MOLA814\_00444 taurine transport system substrate-binding protein  
[Betaproteobacteria bacterium MOLA814 : AYMW01000001]  
MTNKTIKFAIAAALGAVATVVSFAQPKIEITVAYFLEWMPPEYAKQIGAYDEALGMTVNWKAFGTGTAMSAAMASGDVQIAVVSQGV  
PFVVAASGGQSIQVVDIAVSYSDNDCVVS KLEIDKSNASELAGKKVSVPIGTA AHYGF LKQMSHFVSVDSMEVVDMAPPEGAAA  
ALAQGSVDFA CGYGGGLTRMKEYGNVLLTGKEKEALGILVVDVTS SPTNFIAENQQLSKFLKVTANANTQWNAKKDPAMLKVIAK  
ESGMDEAAAAS IATMSFSAKDQLSKQWLGNAQTFMKGVADVFM TAGNIKKVLP SYDKSVNTAPLMQAVK

>WP\_011281961.1 taurine ABC transporter substrate-binding protein [Candidatus  
Pelagibacter ubique]

MKKIISFILGTVVALNLSMSVANAAAKEVVRVAFFLEWPTPNQEDKVKKMFDKALGVPVKWTFNSNGGAMTDAMLAGDIDISYSQGL  
VFFINAVKSKAPLKLVDIAMEYGMGGTTCVTSNASGITKANASELEGKKVAVPLGTMAEYVFDESMKVVGADKSKMTVIQMDPEEG  
AAALVSGDVVMAFLFGGNSIKAATAVGSRLTLVQEARDAGILGIDITSVTDKFMKENPGMLRFTFIEVTHEANARYAAGKSDLNVIA  
KDAEMKLGDMKETLSGFKFLTPEETEKSMTSGNLSGFLKGMGTPNGAVDTSFLPL

>WP\_085114116.1 taurine ABC transporter substrate-binding protein [Candidatus  
Pelagibacter sp. HIMB1321]  
MKKILSFILSSIVALNLSISVANSAAANEVVRVAYFLEWPTPNLEDMNKKMYEKALGVPVKWTFNFTNGGAMTDAMLAGDIDISYSQGL  
VFFINAVKSKAPIKLVDIAMEYGMGGTTCVTSNASGITKANGSELEGKKVAVPLGTMAEYVFDESMKVVGADRKNMDIIQMDPEEG  
AAALVSGDVVMAFLFGGNSIKAATAVGSRLTLVQEARDAGILGIDITSVTDKFMKENPGMLRFTFIEVTHEANARYAAGKSDLNAMA  
KESEMSVGDMDKDTLSGFKFLTPEETAQSMTKGNLHGFLEGMGTPKGNVDTSFLPL

>WP\_014952993.1 taurine ABC transporter substrate-binding protein [alpha  
proteobacterium HIMB5]  
MKKIISFILSCFVALNLSISVANSAAANEVVRVAYFLEWPTPNLEDMHKKLFKALGVPVKWTFNFTNGGAMTDAMLAGDIDISYSQGL  
VFFINAVKSKAPIKLVDIAMEYGMGGTTCVTSNASGITKANGSELEGKKVAVPLGTMAEYVFDESMKVVGADRKNMDIIQMDPEEG  
AAALVSGDVVMAFLFGGNSIKAATAVGSRLTLVQEARDAGILGIDITSVTDKFMKENPGMVRTFIEVTHEANARYAAGKSDLNAMA  
KESEMKVGDMDKDTLSGFKFLNAEETAQSMTKGNLHKFLKGMGTPRGNVDTSFLPL

>WP\_009604762.1 taurine ABC transporter substrate-binding protein [SAR116 cluster  
alpha proteobacterium HIMB100]  
MKSFITRTAAAVALTLSGAAQAADSVNVAFFLEWATPNQIAKVDKAYDEAMGVDVNWTFSTGVAMTEAMLAGDIDIAYSQGLA  
PFVTAIQQAGPLKMGVAVVVEANDCFVANGLGIDSSNASELEGKTVAVPLNTMADFSTRKQMAALNVDTSTMTIVDQAPPDGA  
LADGSVDMACIFGGASAKAAGEVGTPI MSTQKTDAGISFDVIVSVTEKFANENPELVSSFLEVTEEANAAMMATPEQIRKVASDA  
GMDFTTTQNQMAGFLFPTVAEQAADYFGNDGIAAAAAESLGAVFVKTNIKNYKGSVGAIDGSFLQ

>2698166757 Ga0131154\_107133 taurine transport system substrate-binding protein  
[Sulfitobacter pseudonitzschiae DSM 26824 : Ga0131154\_107]  
MTFKSKLMSATAAIAMLTGAQAATAAGHGEITVAYFLEWPMFPQYAKETGMYDEAMGKINWVSFDTGTA  
MSAAMASGDVQLSVSQVPPFVAVTSAGQDLQIVDVAVSYSDNDCVVASGLEIDKDSAGELAGKKVAVP  
LGTAAHYGFLSQMNHFGVDISTMDIVDMPAEGAAALAQGS LDMACGWGALRRMKEHGNVLLTGAEKEE  
LGILVFDATTAPATYIAENGEMVAKFLAVTAKANAMWADEANHATMLPVIKADAGMSEEDTMSTLSTFKF  
PTVDEQLSDKWLNGRAQTFMKGAVGVFDAGSIPSA LDSYAGTVNTGPLEAAKDM

>2551214976 tauA taurine transport system substrate-binding protein [Planktomarina  
temperata RCA23, DSM 22400 (RCA23) : RCA23c]  
MKMKTALKSAVAGLTLVSGSAAFAGGHGELNVAYFLEWPMFPQAAKVS GAYDAALGMKNWVSFDTGTAM  
SAAMASGDIDISVSQGVPPFVAVTSAGQDLQIVDVAVSYADNDCVVASGLEIDKNSAGELAGKKVAVPL  
GTAHYGFLKQMEHFVSLDSTLVVDMAPAEGQAALAQGAVDMACGWGALRRMKESGNVLLTGAEKTEL  
GILVFDVTTAPSGFVAENADIVAKFLAVTADANTAWNTSQPEFMANMIAQDAGMSVEDAKSSMSTFVFPD  
IDTQLSQSWLGGNAQTFMKGAVADVFNAGSIDSAKGSYADNVNTGPLASAKGM

### Xsc (HMM cutoff score = 258)

>WP\_044028790.1 sulfoacetaldehyde acetyltransferase SPO3561 [Ruegeria pomeroyi]  
MKMTTEEFVKTQLQMHGIEHAFGIIGSAMPI SDIFPAAGITFWDCAEHSGGFMADGYTRATGKMSMMI  
AQNGPGITNFVTVAVKTAYWNHTPLLLVTPQAANKTIGQGGFQEMEQMRMFADCVAYQEVRDPSRVAEVL  
NRVIMNAKRASAPAQINIPRDMWTQVIDIALPAIVEFERPSGGEEAVAAAEMLSNAKNPVI LNAGVVL  
SKGGIAASKALAEERLDAPVCCGYQHNDAPGSHPLFAGPLGYNGSKAGMELIKTADVVLCGLTRLNPFST  
LPGYGMEYWPADAKIIQVDINPDRIGLTKKVS VGIIGDAAKVARGILAQLSDTAGDEGRAARKDRIAQTK  
SAWAQQLSSMTHEDDDPGTTWNERARADKPDWMSPRMAWRAIQAAALPREAIISSDIGNCAIGNAYPDFD  
EGRKYLAPGLFGPCGYGLPAVVGAKIGCPDVPVVGFSGDGAFGIAVNELTAIGRGEWPAVTQIVFRNYQW  
GAEKRNSTLWFDDNFVGTDELDRVSYAGIAKACGLQGVVARTMDELTAALAKAIEDQKAGKTTLIEAMIN  
QELGEPFRRDAMKKPVRVAGIDKADMREQV

>WP\_008033816.1 sulfoacetaldehyde acetyltransferase [Rhodobacterales bacterium  
HTCC2255]  
MKMTTEEFVKTQLQMHGIEHAFGIIGSAMPI SDIFPAAGINFWDAAEHCNAGMMADGYTRASGKMSMMV  
AQNGPGITNFVTVAVKTAYWNHTPLLLVTPQAANKTIGQGGFQEMEQMNLFADCVAYQEVRDPSRIAETL  
NRVILQAKRASGPAQINIPRDFWTQVIDIELPKVVEFERPSGGSDALNQAAELLSNAKFPVILNAGVVL  
SSGIPASAALAERLDAPVCCGYQHNDAPGNHPLFAGPLGYNGSKAGMELISKADVLLALGTRLNPFSTL  
PGYGDYWPKDAKIIQVDINADRIGLTKDVTVIGVGDAKKVAEELSSLSHDHAGETNRADRKATIAKTKS  
AWAQELTSMDEDDPGTTWNERARSDKPDHMSPRMAWRAIQAAAMPNNAISSDIGNCAIGNAYPSFQE  
GRKYLAPGLFGPCGYGFPPIAGAKIAQPNVPIVGFAGDGAFGISMNEMTAVGRGEWPAITMVI FRNYQW  
AEKRNSTLWFDDNFVGTDELDEVDVSYAAIANACGLVGVQATSMDDLTDKLDAAIKAQMNEGKTTFIEIILN



KELGEPFRRDAMKAPVSVAGISKNDMIPQKGA

>WP\_088919161.1 sulfoacetaldehyde acetyltransferase [Granulosicoccus antarcticus]  
MKMTTEEAFVKVLQRHGIEHAFGIIGSAMPIISDLFPAAGIKFWDCAHECNAGMSADGYTRATGKMSMAI  
AQNPGGITNFVTPVKTAIYWNHTPMLLVTPQAANKTIGQGGFQEIQKQMALFEDMVAYQEEVDRPSRIAIEVL  
NRVILQAHRLAGPAQINIPRDYWTQVIDIELPQVFRLEPRGGEQAIQDAAALLSEAKFPVILNAGVVL  
AGGIDASAKLAEKLDAPVCCNYQHNDAPFGSHPLSMGPLGYNGSKAAMEIISKADVVLALGTRLNPFSTL  
PGYGIDYWPKDAKLIQVDINADRIGLTKAVAVPIQGDAKRVAEQLEQLSASAGNADRAERKSLIDQTKK  
RWSQELVSMHEHEDDDPGTNWNERAREREPCKMSPRNLAWLAIRDAMPADAISSDIGNCAIGNAYPTFEQ  
GRKYLSPGLFGPCGYGFPAILGAKIGCPDVPVIGFAGDGAFGISMNEMTACGRNDWPPITMVI FRNYQWG  
AEKRNTTLWFDDNFVGTDELQVNYAKIAEACGLKGVQVDSSTEALTEALNTAVKEQMEDGVTTFFIEILLN  
QELGEPFRRDAMKQPVSVAGIDLADMIPQQTV

>2779882284 sulfoacetaldehyde acetyltransferase [SAR116 cluster alphaproteobacterium  
MED880 : Ga0267689\_113]  
MKMTTEEAFVKVLQRHGIEHAFGIIGSAMPIISDLFPQAGITFWDAAHENAGMMADGYTRASGKVCMMVAQNPGGITNFVTPVKTA  
YWNHTPLLLVTPQAANKTIGQGGFQVEQMAAFKDMVAYQEEIRDPSRVAEVLNRLITKAKRMSAPTQVNVPRDLWTQVIDIELPE  
ILSFERPSGGDDALSAAQMLSEAEFFVILNAGVVIIGGAI PASMALAERLDAVCCGYQHNDAPFGSHPLFAGPLGYNGSKAGME  
LIAKADVVLALGTRLNPFSTLPGYGIDYWPEDAKIIQVDINPDRIGLTKPVTIGIIGDARKVAEGLLEKLGPOAGEKGRSSRTAVI  
AKTKSAWAQELTSLDHEDDDPGTTWNERARKREPCKMSPRMAWRAITSVLPKDAISSDIGNCAIGNAYPTFEQGRKYLAPGLFG  
PCGYGFPAICGAKIAQPDVPVVGAFDGAFGISMNEMSVGRDEWPPITMVI FRNYQWGAEKRNTTLWFDDNFVGTDELDTDVTYAG  
IAQQCGVKGVQVDGMDALAEALDKAIEAQMKDKVTTFFIEVVLNQLGEPFRRDAMKPPVSVAGIDPADFRPQQPVS

>2654250678 sulfoacetaldehyde acetyltransferase [SAR324 cluster deltaproteobacterium  
REDSEA-S27\_B3  
MTTEEAFVKVLQMHGIEHTFGIIGSAFMPISDYFPKAGITFWDCHECNGGYMADGFTRSTGKMAMI IAQNPGGITNFVTCVKTAY  
WNHTPMLLVTPQAANKTIGQGGFQVEQMAAFKDMVAYQEEIRDPSRVAEVLNRLITKAKRMSAPTQVNVPRDLWTQVIDIELPE  
VNFERPSSGGVGAIAAAEELLSNAKFPVILNAGVVLGDAISASQALAEERLDAVCCNYQHNDAPFGSHPLFAGPLGYNGSKAGMEL  
IKQADVVLALGTRLNPFSTLPGYGMIDYWPNDAKLIQVDINPDRIGLTKPVSIVGIVGDAKQVAEQILAQLSGSAGDAGREERRNRIA  
TTKSAWAETLASMNHEDDDGTSWNERTRKRQPDHMSPRMAWRAIMEALPKEAIISSDIGNCAIGNAYPTFEQGRKYLAPGLFGP  
CGYGFPTIIGAKIGNPDTVPVVGAFDGAFGISMNEMTAVGRNDWPAITMVI FRNYQWGAEKRNTTLWYDDNFVGTDELQVFAEI  
AVACGVKGVKAKSMNELTEQLETAIKAQMEQGETTFIEAVLNQLGEPFRRDAMKTPVPVAGINKDDMCVQQG

>2731912897 Gammaproteobacterium bacterium SCGC AG-487\_F09  
MKMTTEEAFIKTLQMHGIEHAFGIIGSAMPIISDLFGRAGISFWDCAHEGSGGMMADGYTRATGKMSMMIAQNPGGITNFVTVAVKT  
AYWNHTPLLLVTPQAANKTIGQGGFQVEQMAAFKDMVAYQEEIRDPSRVAEVLNRLITKAKRMSAPTQVNVPRDLWTQVIDIELPE  
TMIDFELPSGGESAIISAAEELLSNAKAPVILNAGVVLVSAAGIASSMALAERLDAVCCGYQHNDAPFGSHPLFAGPLGYNGSKAG  
MELIREADVVLALGTRLNPFSTLPGYGIDYWPWKAKIIQVDLKPERRIGLTKAVSVGIVGDAAKVANGIMAQLSATAGDAGREARKA  
HIAQTKSNWVAELAAMTHEHEDDDPGTTWNRARADKPEWLSPRMAWRAIEAVLPKEAIISSDIGNCAIGNAYPTFEQGRKYLAPGL  
FGPCGYGLPAVVGAKIGCPDTPVVGFSGDGAFGIAVTELTAGREEWPAITQIVLFRNYQWGAEKRNTTLWFEDNFVGTDELQVSVY  
AGIAQACGLQGVQARTMDEVSAALSQALEDQASGKTTLIEILINQLGEPFRRDAMKNPVEVAGVSIEDMRPQKGS

### dddQ (HMM cutoff score = 223)

>gi|83951699|ref|ZP\_00960431.1| hypothetical protein ISM\_14090 [Roseovarius  
nubinhibens ISM] /dddQ/  
MDPRWTTLLQEARAAGHATPELRDFCAFPDALRDQPGDPRPDPLAVTLQDAPGDT SARWQGRDAACAVGPIARWRD TYRHTAIGA  
DLHRHFQCYELLGQDAPYGTQMRGFLVYQRPYHYPPHHHPAEIYLVVAGEAEFHLDGHAPRRLGPGGT VHFPSGVAHALTHD  
SPVLAWLWRGEMDTRPVFSDPALQGEAQR

>gi|83951698|ref|ZP\_00960430.1| hypothetical protein ISM\_14085 [Roseovarius  
nubinhibens ISM] /dddQ/  
MSGRAALTHLLEAARDWHEALPEFRAFATWPEDLRWADRPAHALPVIDHLTRDPGHASDQSQPLRDALVAAAPHVEWRHSYTEAEV  
GRDFLNRFGWFELAGPSGHFLTQSLRVTVGYWGPGLDYGWHEHLPEELYSVVSGRALFHLRNAPDLMLPEPGQTRFHPANAPHAMTT  
LTDPIILTLVLRGAGLGDDPRMSQ

>gi|56696480|ref|YP\_166837.1| hypothetical protein SPO1596 [Ruegeria pomeroyi DSS-3]  
/dddQ/  
MTQTDPAFQNLAEFQALHAREPALAGFVALPDSLTPQPVTPVRIIPPAALMESDPLDTTAYAAIRDAFIAAGAVAQWRLTYQGSR  
LGADMDRFACYCLIGEGGPFASDSLAAAYVVYPAGLYYFPFHQHPAEEIYFILAGEAEFLMEGHPRRLGPGDHVHFPSGHPHATR  
TYDRPFMALVLRGDLLETAPVLTYPEGEI

>gi|254465895|ref|ZP\_05079306.1| conserved hypothetical protein [Rhodobacterales  
bacterium Y4I] /dddQ/  
MSLSQALQAARDLHAKLPALREFAPWPGDLEPAALAPAAMAAQDQVAGFNLPGTADTQPLIDLALRTAAGHAHWTTQTYTEAEVGAHF  
LQNYGFELFGPAGHFRSTRLRGYIAYWGAGLKYDWSHEAEELYVVLGGGAQFLTEENESWLQAGDTRLHGHWQPHAMNTGAEPV  
LTYVLRGQGLAGLPLMGKRTAA

**dddD (HMM cutoff score = 150)**

>sp|A6W2K8.1|DDDD\_MARMS RecName: Full=CoA-transferase/lyase DddD MWYL1 MNKQNLPLVGVVADFQQIAGPAVAMVLADLGATVVVHIDPPGGPSWKHPANAILNRNKASLCIDLKTQ AGLDQALELIEVNDIVIESFRPGVMKRLGIDFVALRESRPELITLSMPGFASNDELHRDWKATEAIVAAT SGTFTDMGFNRVLMGLNPSFSPLPLGSSYAIISLAASSIALALFEREKTGRGDNIEVPIAAALMEGLSYNS YVVDQLPERYKTMRELEIEHRKSNNIKMDVSYAQLQEYLDPPFYRTYVCADGRQFYCVCPSHRNHAERALK VLGIVDELVAEGLPEVKDLHVPISEWDGETSIGVYPLPKKWADLISEKMKKAFKQTSDEWGVIFGEGQI PGAPHRSTEEWVNSEHCNASGLIVEVEGTEFGTMKQPGPIVWFENESEAMLKPKPQEHVSFEQALARLQS VAKIEKISRPTGQDIQPASGKGWLDGKILDLTNIAGPHSTAFMSRFGAEITKLDPVTPLYDPLIGILF TFQTVGKQKQSALVNIMTKEGREVFERLVRSDIVVINAPDRQMKPLGLDQDLSAINPDVLFRCRLDCFGG PRTGSKTNYIGYDDI IQANSGIMSRFGKPEPTEEHAHLGTLDVNCGFAAALGMVIALYQKRKTGKVCVRV TSLSAVTNIAQIIPFAFDYEGRAPFNEASGREAMGNHALSHFYRTNSGWVFLDSHQGELAKLDAIKGLNGI QQSQDMGQFLRDQLVKESAYWLKEFAAADIACAEPFSIEYLREHNSRVADQKVGTDLGSYAFSIFPDHP SGHCITQVDPYSIRPREAKIRAVTPTTEKFGCSTIKVLQGLGYSESDINDMLEKKIAATGWGREFLPS

>EBA08656.1 CaiB/BaiF family protein [Sagittula stellata E-37] MRKSFNSLPLTGKVVDFGQYIAGPAVAMLLGDLGATVVVHIDPPDGPMDWSPANAAALMRNKLIVNLDLKS EDGLAKARALCSEADIIVENFRPGKLAKLIGIDFAAMREERPELITITISIPGFASNDELRRERAFESVVA SSGVFTDMGLNRVLMGVNPSFSPLPLSSSYASQIAASATVLALQSRQLTGLGDQIEVPLAAAVMEGLCYN SIHVDVDPKRYLTQREIEIERRRIEGLPMNVSYEDLQELLDPPFRSYMCKDGRMFYVVCPSHKNHARRCL EVLGLYEEMVEEGLQEEDDQYKQAEWETDTSGLGVYMPKFWADKIAARMKEVFMTRTSHEWKRMFGRAG IIPGAPQRWLQEWINDEYAEASGLMIDVWDPEYEMTQPGPVVWMEESGEEALTPERRRWFVFEALKVLRL KLRDIPDPEDGIEHQEGWLSGVRVLDMCNVIAGPHSASYLARFGAEVIKLDPAVPLYDSWNTVMYGMSQG RGKRSILADVKEHGRKVFEDLVKTVDVFIWVNPADSQIKRMGLDEAGLRKLNPEAIFCKLDCFSGVRGVR RSDYIGYDDLQVATTGIMLRFGGAMDRPEEHAHVGTIDVMCGFGGALAVAAALYQKNRFRIGRGRSLS ANSGLLQIPFAYDYRGRGLFDEPTGPEVNGYDALSRFYSTASGIYILLAYEADLPRFRNVEGLEEFDPV PEEDRAAFLAGAFQSLPATEWIDRLRAADLACAICQNIERALRAENLQEADGTPGTRDGSYSFSLYTDHPS GHDVTQLDPYAVRPARGRVFAISPTTEKFGTSTRDILNELGYSVSAVERMLKSGQVSESWSAEYLP

>Ruegeria pomeroyi dddD MQNRPLSHIRVLDVFGHYLAGPLVGMMLADLGAEVVRIIDPPAGPRWKDPAFDMLSRGKRAL TLDLKTADGRDALTDLVRRADVVIENFRPGVMERLGLGPDALRQANADIVLSLPGFAST DPEFAGWAWEAVIAARTGQFTDMGLNRRLMGINPSFTPLGLASAYGAAFGTMSVLFALG ARSRMGGDHIEVPLASALLEGLIYNCEQIEDYDPDRYKSPRELELERRAGEGLPNNLSFAE LSEFLDPFYRTYTCADGRGFYIVSCSIVNHPQRVLEVLGLGELLKELPDFDVYVDQADWP GEWALRSYPVGADDRKRLSDAMKAFLTRPAHEWEELFGVAKAPATAQRSTAEWLVDPHA LASGLVVALDDPRHGQMRQMGVNAWLTDPPGAMKVVAGPEQDDFRDALSGVLAEP RRRPT GGDSKGVWLDGLKVLDLTNVIAGPTIGSTLARFGAQTIVLQVPRPSVDPWNAVVFGLHAQ RGKESVLLDLRSEQQALWRLVAEADVITMNGTDQQRDALGLTEARLNEVNPRLILVQL DAWGGPRRGPKSDHLGYDDLAQAATGVMTRFGGGPETPEEHAHVGTIDALTGHACACVALG AALERLRVTGKGGVARASLAAAGEMIQAQFMYDFDGRPAFDEPSGREVIRGWGSFYRCYAA ADGWMFFAAPTERDAALQRPVLDLVLGKDDADLELLAERFAQKRVADWMMRAFAGGSVG ITPGLSLHGTRDAGLQRESEGEIDISKATFRAVRHRHRPMGRVVDLVAVNAVRPEKTRIT IIPGAPKYGQHTREVLAVGVYADDEIGRMIESGAAQSWSDKYLPE

>643822352 YP\_002822700 dimethylsulfoniopropionate cleavage enzyme DddD [Rhizobium sp. NGR234 plasmid pNGR234b: NC\_012586] MTSISRSALPLSGVRVDFGQYIAGPAVAMILGDLGATVVVHIDPPGGPMW DNPANAILNRNKLIVTIDLKTAHGLEEARALIAGADVVIENFRPGVMARL GLDFEALRTVRPELITLSIPGFGSNDQLRRDWRAFETVIAASSGVFTDMG LNRVLMGINPSFSPLPLASAYGTMLAASATVLALQARERTGHGDHIEVPL ASAVMEGLSYNSIKIDYPLRYQTQREIREIERRQREGLPMDMSYEDLQQF LDPFYRSYLCSDGRMFYVVCPSHRNHAKRCLQALGLYDELAEEGLREEED TYLPVSQWSSDVS LGVYPLPKHWADKIAARMKEVFLTKTAAEWERIFGEG LFPGAPQRWLKEWISDDHANAAGLMEVDDPVYGRMTQPGPLTWLQESAE AMLTPQPRRWGSVDEAVELLSRTGSLKIPAATSSNSGGWLDGKVLDLN VIAGPHSVAYLARFGAEVIKIDPAKPLYDCWNTVIFGMSSHMCQKQSVLLN IGSPDGRVVFHEHLVKSVDVVVWVWVNDRQVQKMMGLDAESLEALNPNAIFCQ LDCFGVRRKGPRTDYLGYDDLQVSATGIMLRFGGSMQTPPEEHAHVGTIDV MCGFGAALGVAAALYQKSKTGIVGRPRTSLSALTGLAQIPFCYEEYGRGP FDEPSGRDIKGYDALSRLYETGSGDYILLCATEADLPRLVTVEGLERLAS VAVPDREGWLARAFMSAPAETWQHRLQLQADVGVSLCENIETIRARSARVS DGTPTGTRDGSYSFSIFPDHPSGHTVTQLDPFAIRPAVGKVIIVTAEKYG ASTRSVLKALNYTDAEIDRMIASGTASETWSAEYLP

**dddL (HMM cutoff score = 130)**

>dimethylsulfoniopropionate lyase DddL (EC 4.4.1.3) [Sulfitobacter sp. EE-36]

MTFDTAAPTTLRDVPDWRVMMQECDELYRYLPAGGSDRIKSHQRKAREAI  
ARLLRGNAELRLQPRAEKPVTAHLRRALDEGKQGALAPAVRALDAVAHDL  
SWQYGYEKVPKGLTNSYAYAELAGAQGPVVSHDIILGVVLFAPGCTYPAH  
AHKGITESYVCLSGAVSENHQGVYVPGSMIFNPPEHLHRITVGDREPALL  
AYAWMGDPADLHQQKMFTRARK

>dimethylsulfoniopropionate lyase DddL [Dinoroseobacter shibae DFL-12]

MPDLNPETPAEASALRLMDCPNWVYLLREFDALYRYGSAGGSPAIRSHR  
KRVRDRLSAVLAANPAMVDRPRETKPVVAHFARALDLGERAAMQGMVRAL  
REVKDDLWEYGYEKVPKALAQKYAYCEVLGPRGPVQGTTLTLGFVLFAP  
NTTYPQSHHDIEESYTSVSGAWSENNAAVFAPGSLILNTSGHEHRITTG  
DRDPCLLAYAWAGPAERLATPDMKLTAPRRARGAGV

> dimethylsulfoniopropionate lyase DddL [Rhodobacter sphaeroides 2.4.1]

MHSLSERVEQLRLNDCPDWLYLLHEFDALYRQGSDDGSRPIRTHRKRVRD  
SLALIVEANPAVNDRPPEVKPVTAHLGRALDLGERGAVQGMRSALARVAG  
RLTWEYGYEKVPKALARKYAYCEILGPRGPICAERLILGFVLFAPSTTYP  
QSHSKDIEESYISVAGAWSENDAAVHAPGSLILNRPGLEHRITTGDLSPC  
LLAYAWTGSEERLNQPGMKLSSPRKARIEKGI
